# Supplementary material for: Variation in stem bark conductance to water vapor in Neotropical plant species
Source: Frontiers journal article supplement (doi:10.3389/ffgc.2023.1278803), 2024-01-17
Supplement: Data_Sheet_1.DOCX [file Data_Sheet_1.DOCX]

**Supplemental Materials**

**Variation in stem bark conductance to water vapor in Neotropical plant species**

Eleinis Ávila-Lovera1,2 and Klaus Winter1

1Smithsonian Tropical Research Institute, PO Box 0843-03092, Balboa, Ancon, Panama

2School of Biological Sciences, University of Utah, Salt Lake City, UT 84112, USA

**Table S1**. List of study species, family, growth form, leaf habit, site and gbark values (separate excel file).

**Figure S1**. Photos of the set up to dehydrate stems and measure gbark. It is important to note that these experiments were conducted in the home of the first author because of the Covid-19 lockdown in 2020-2021 in Panama.

**Figure S2**. Histogram showing the distribution of gbark values. Most values are concentrated between 0 and 10 mmol m-2 s-1.

**Figure S3**. Bark conductance values among families studied.

**Figure S4**. Bark conductance as a function of leaf habit. There was no statistical difference between leaf habits (p = 0.340).

**Figure S5**. Mean monthly precipitation (mm) and temperature (°C) in the six sites studied. Gamboa common garden (GCC), Nueva Arenosa (NAR), Panama City (PC), Parque Nacional Altos de Campana (PNAC), and Parque Natural Metropolitano (PNM), and Parque Nacional Soberanía (PNS).


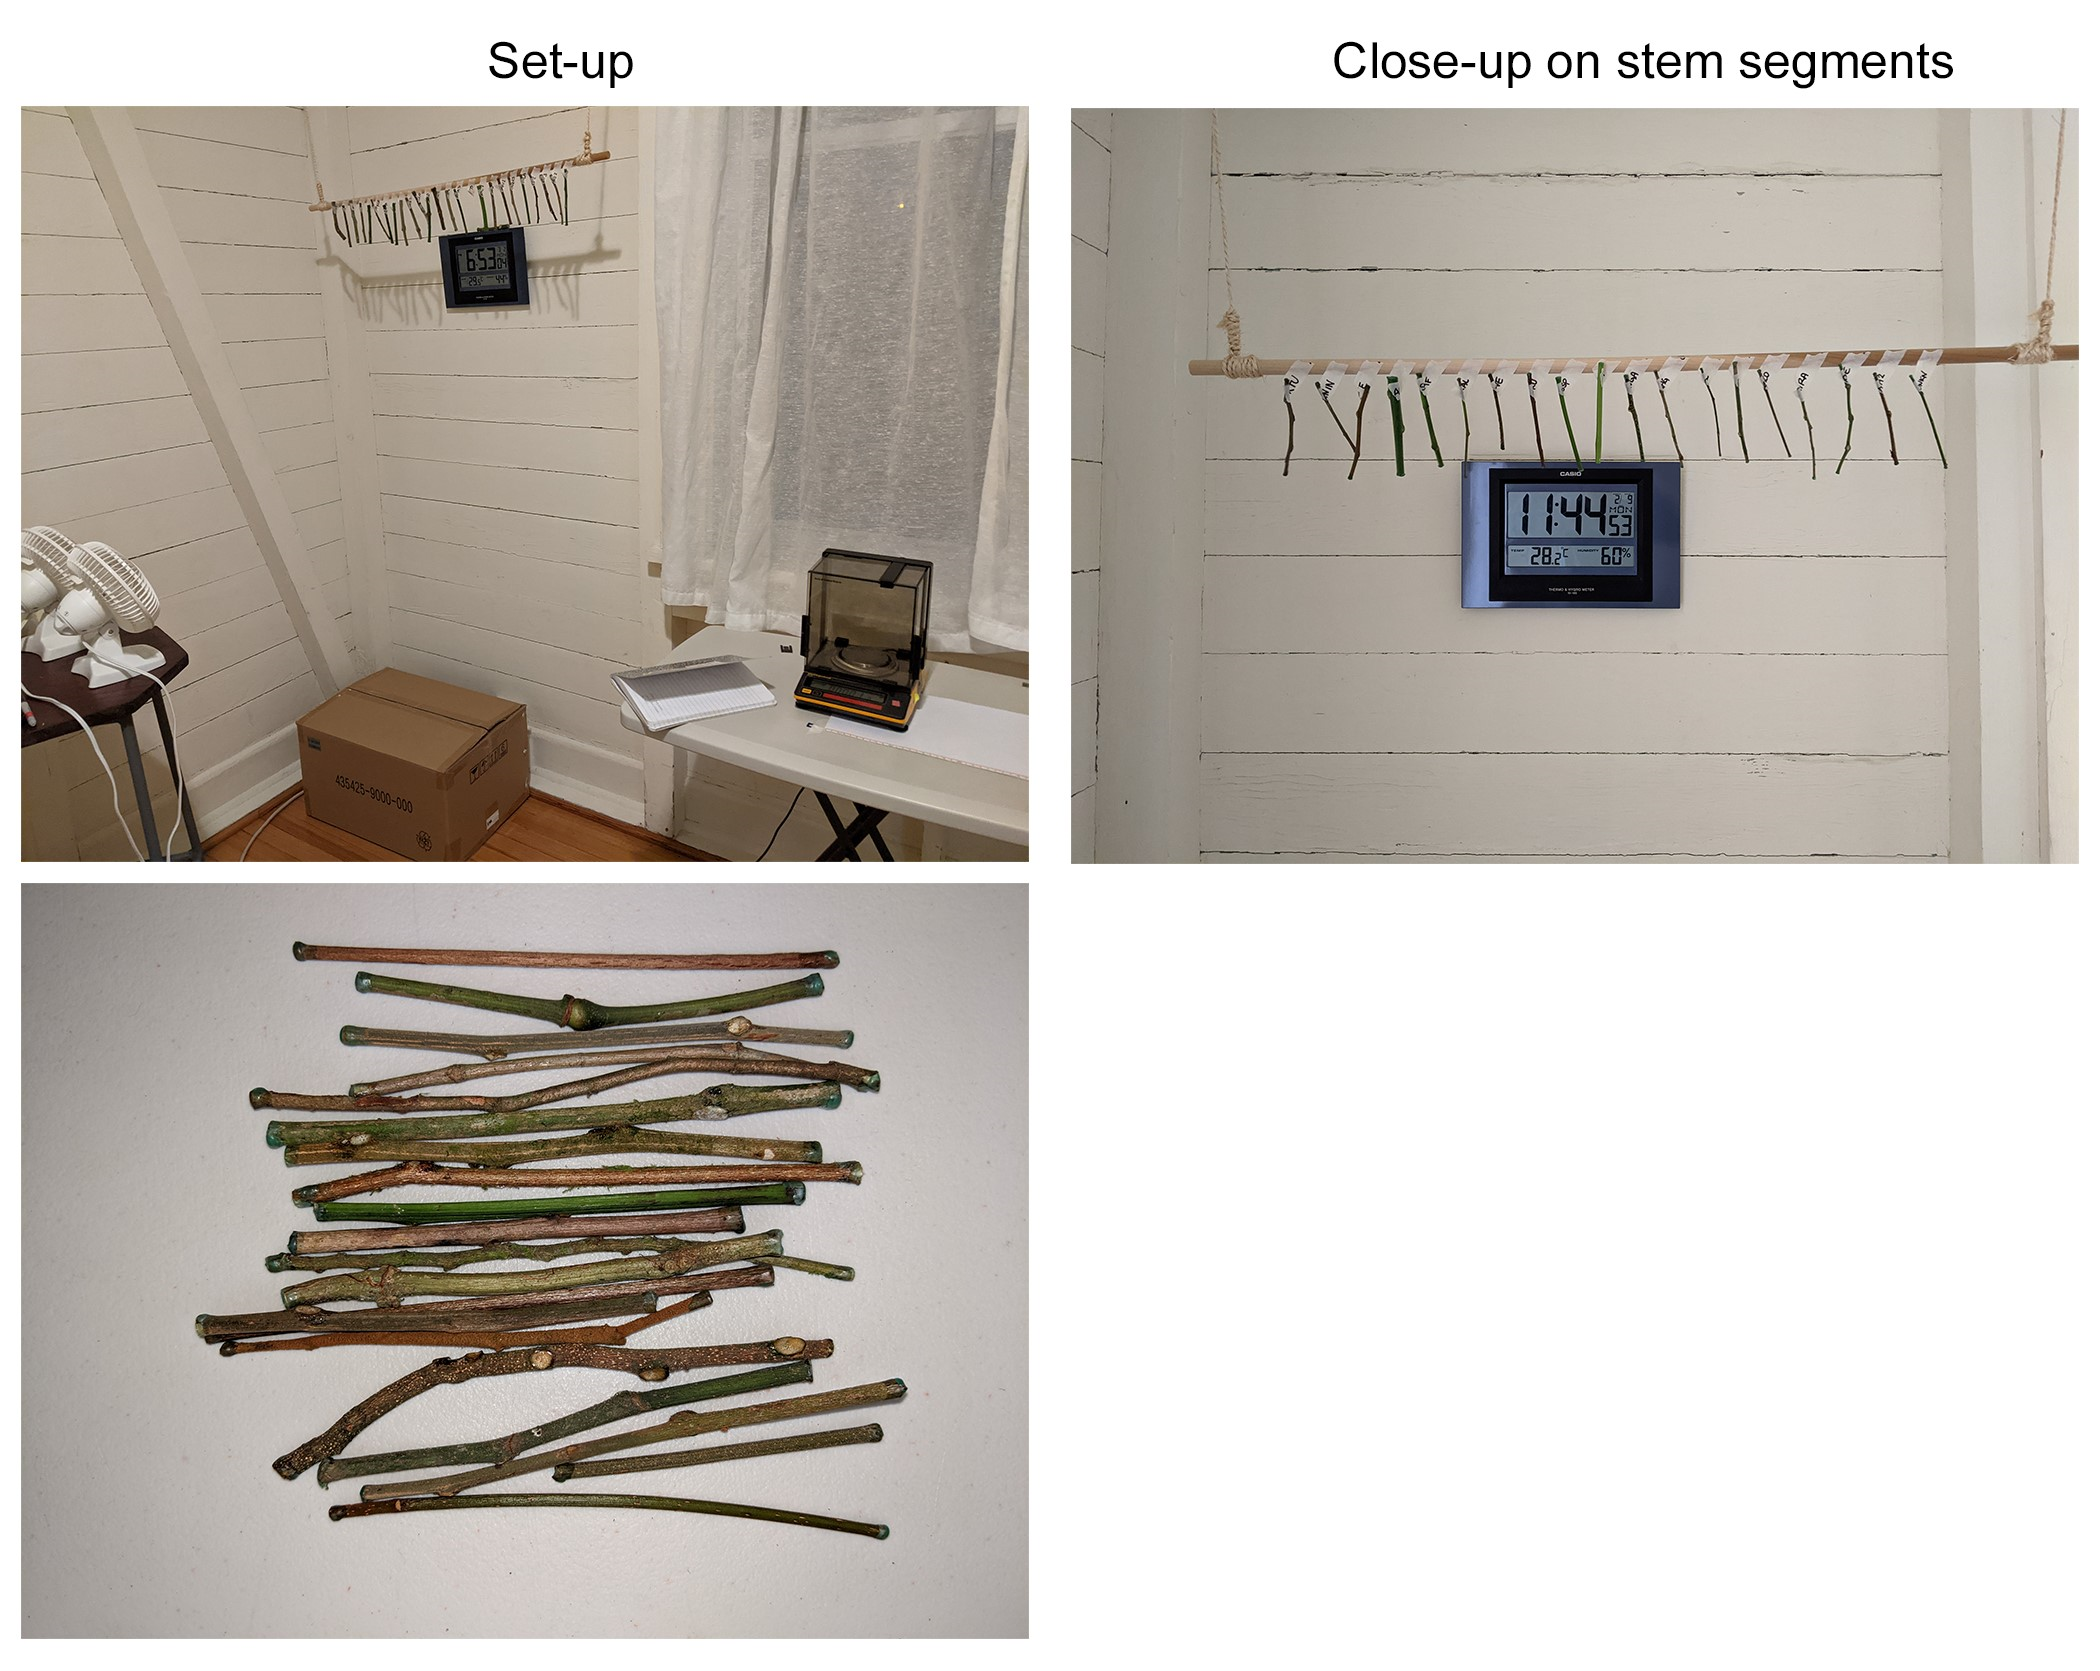


**Figure S1**


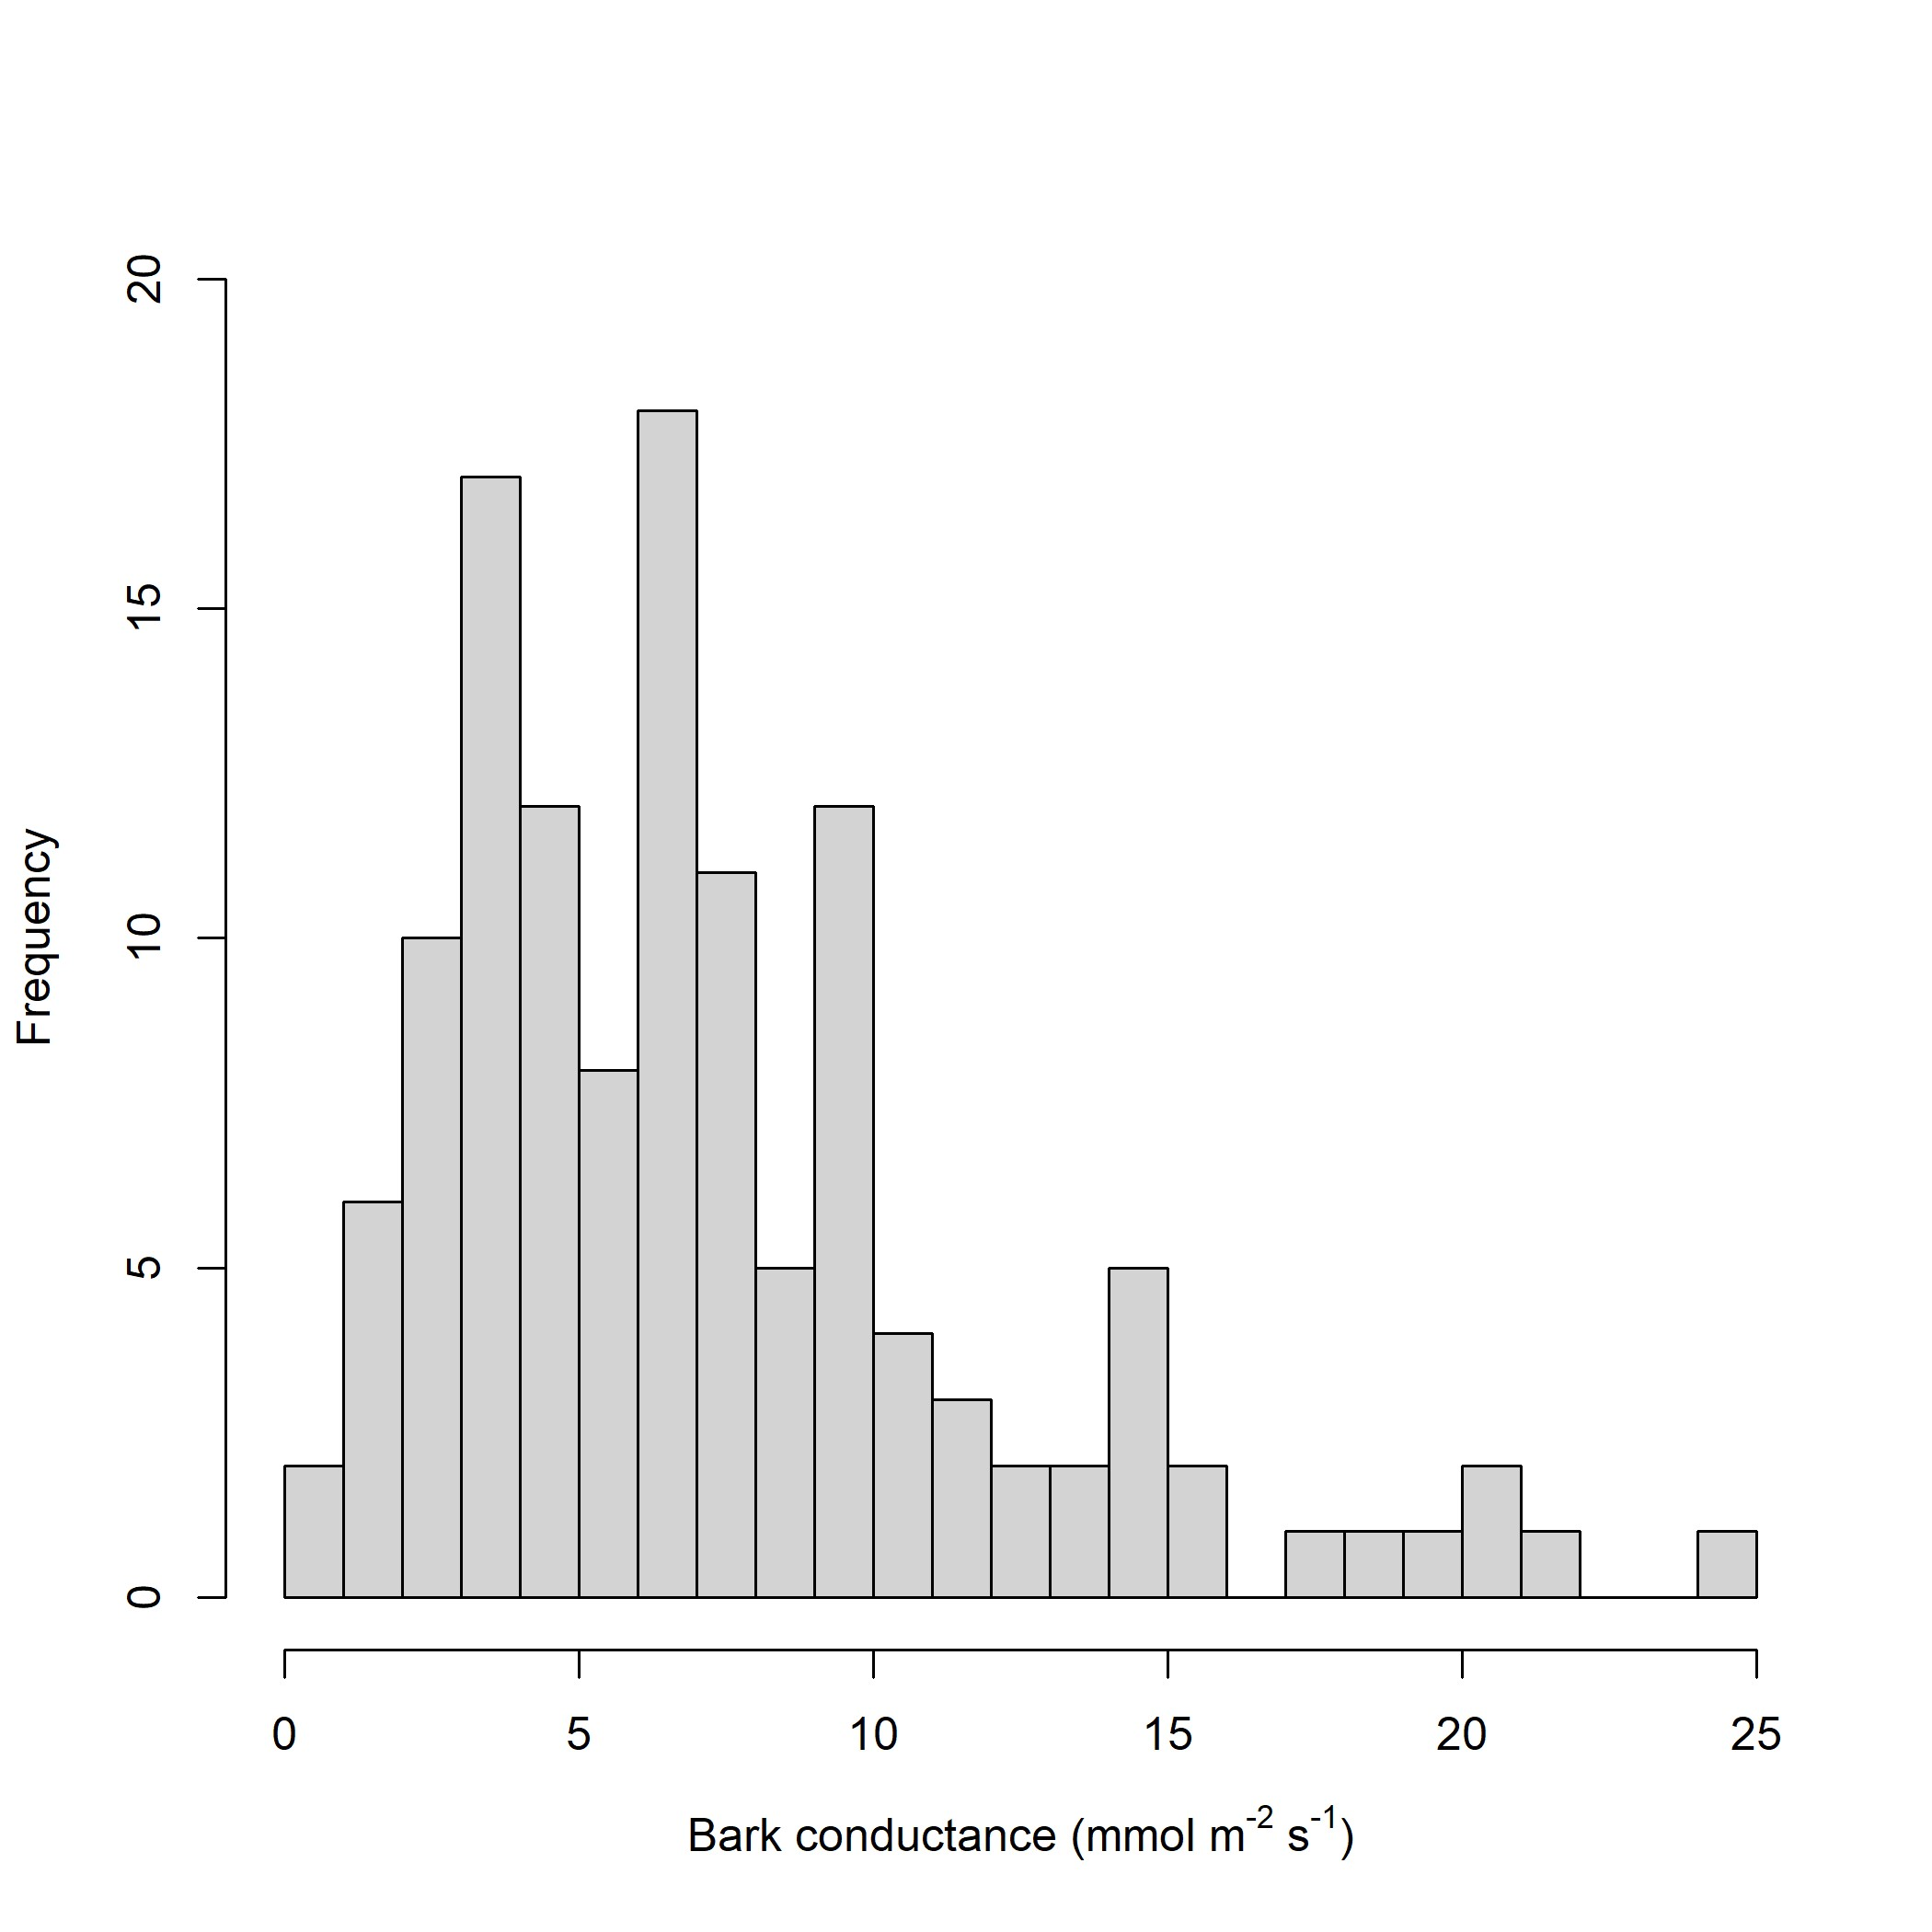


**Figure S2**


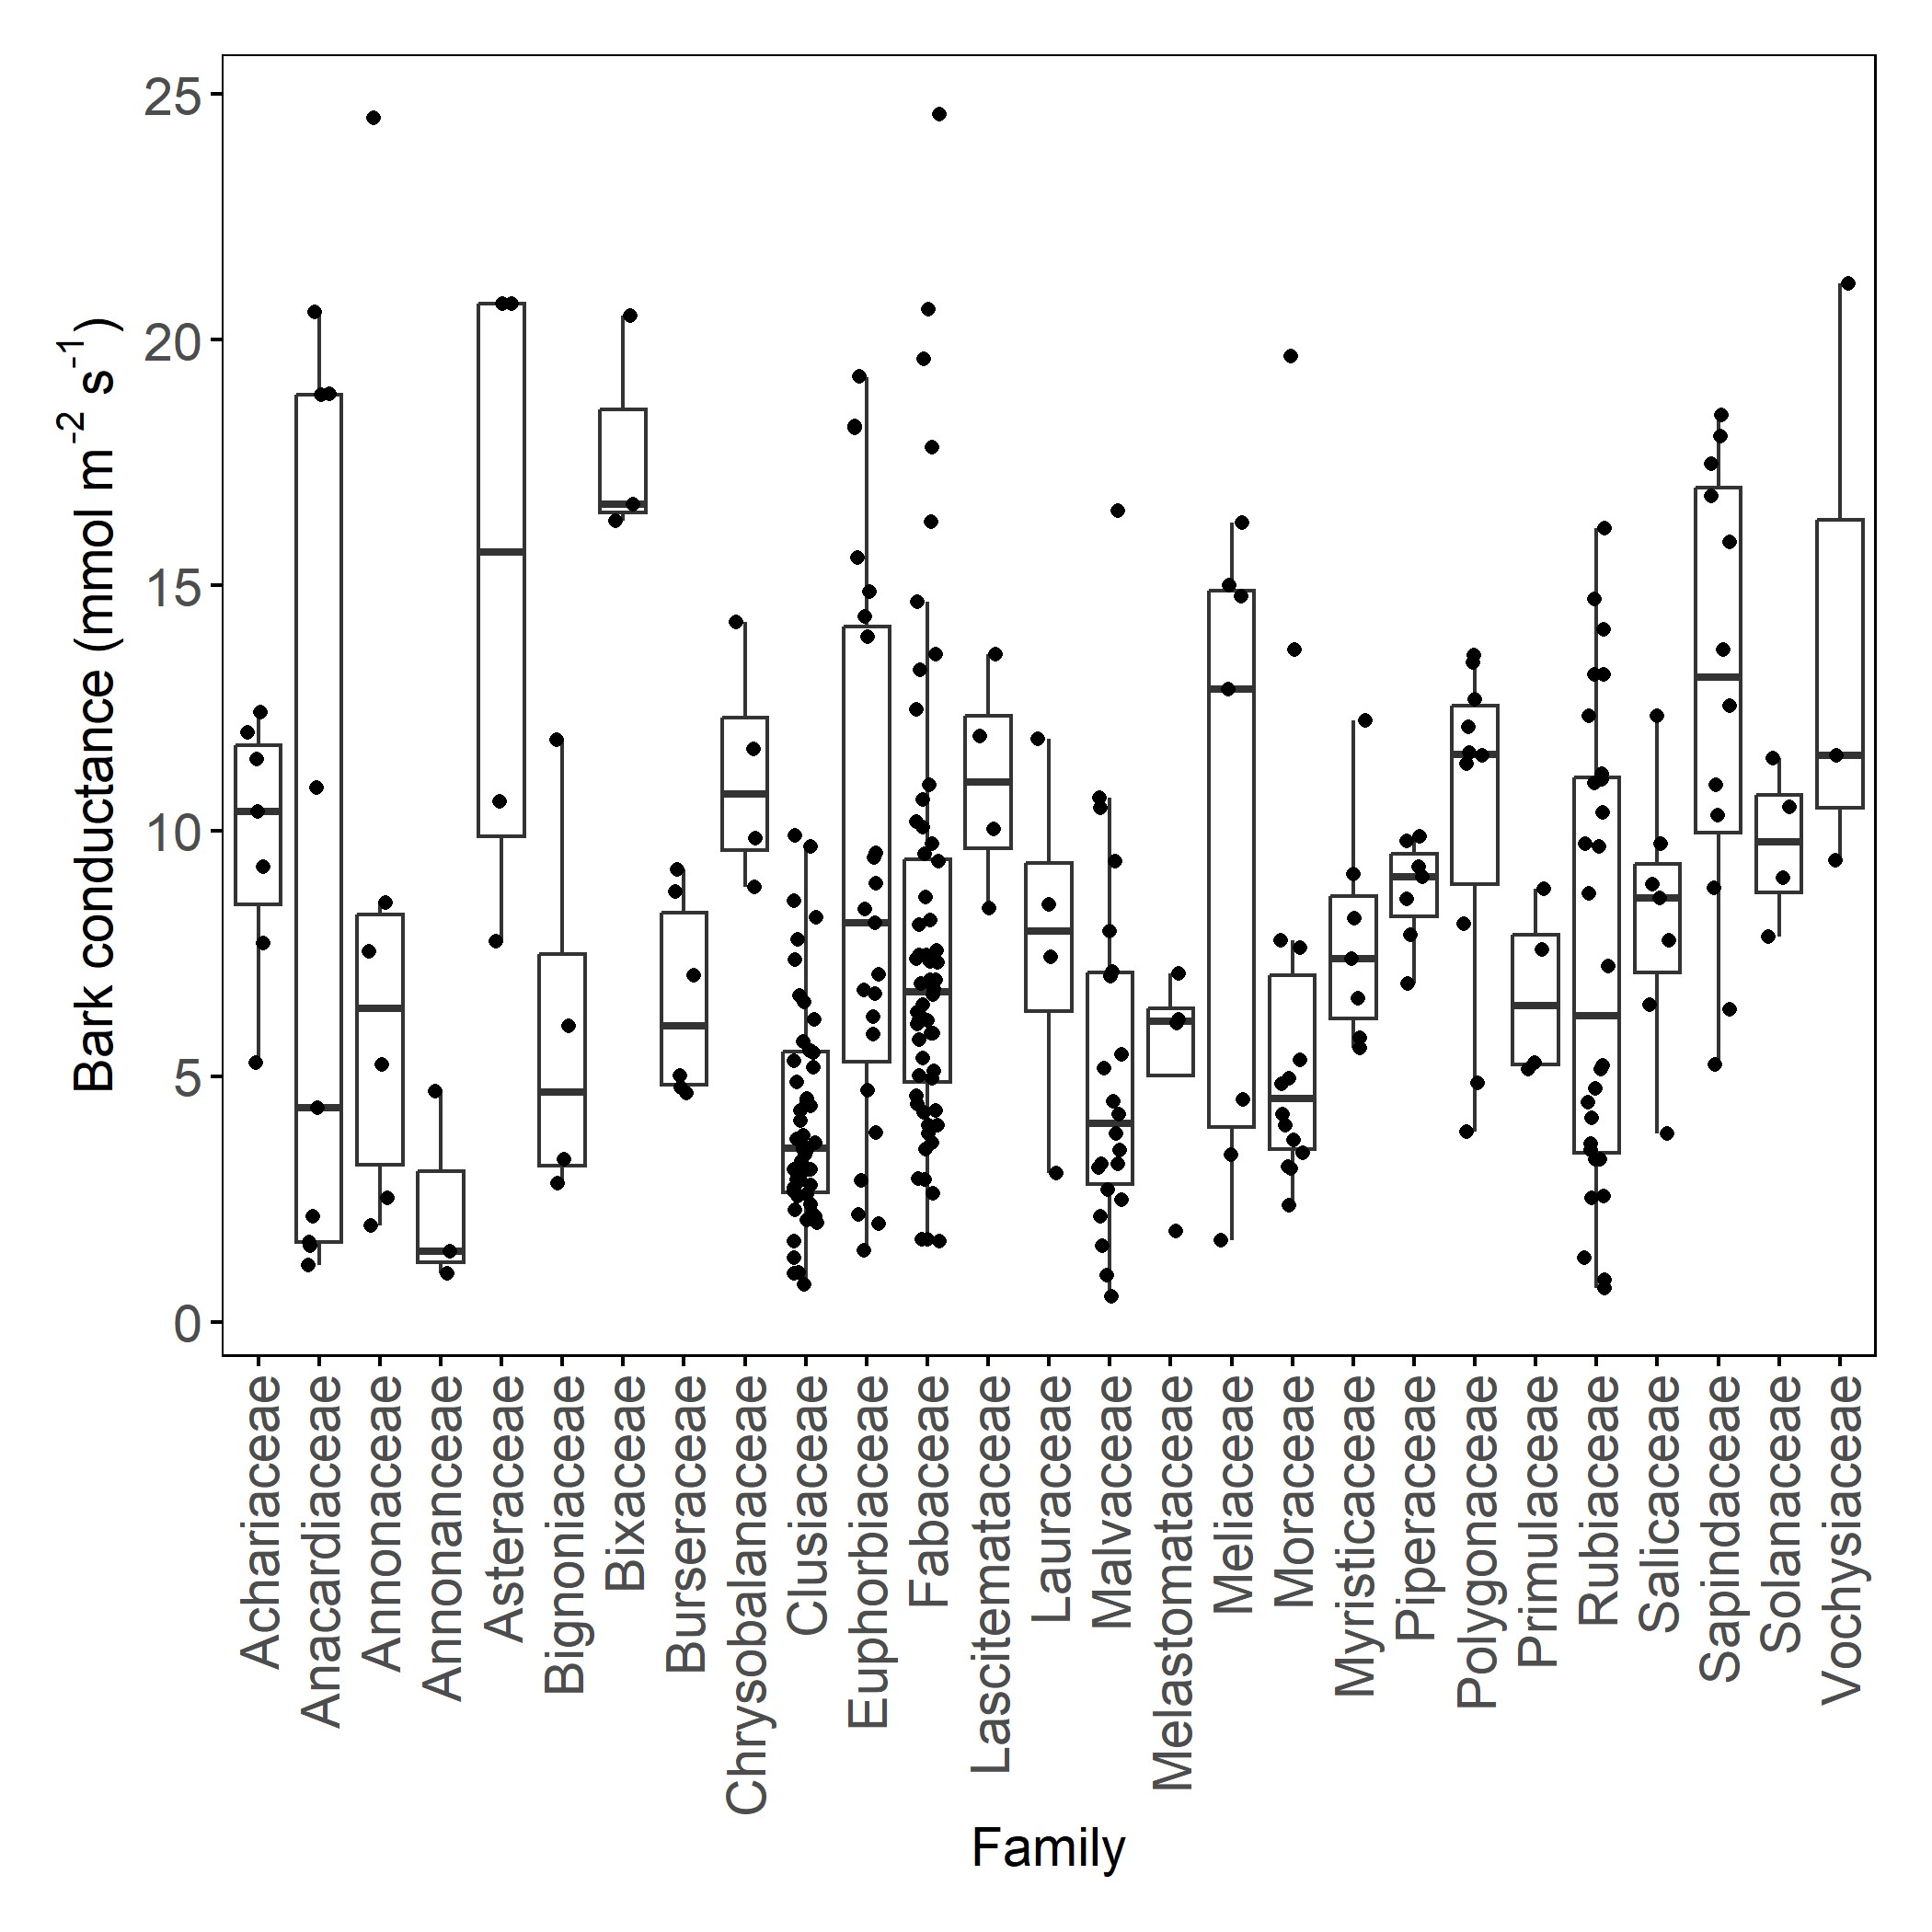


**Figure S3**


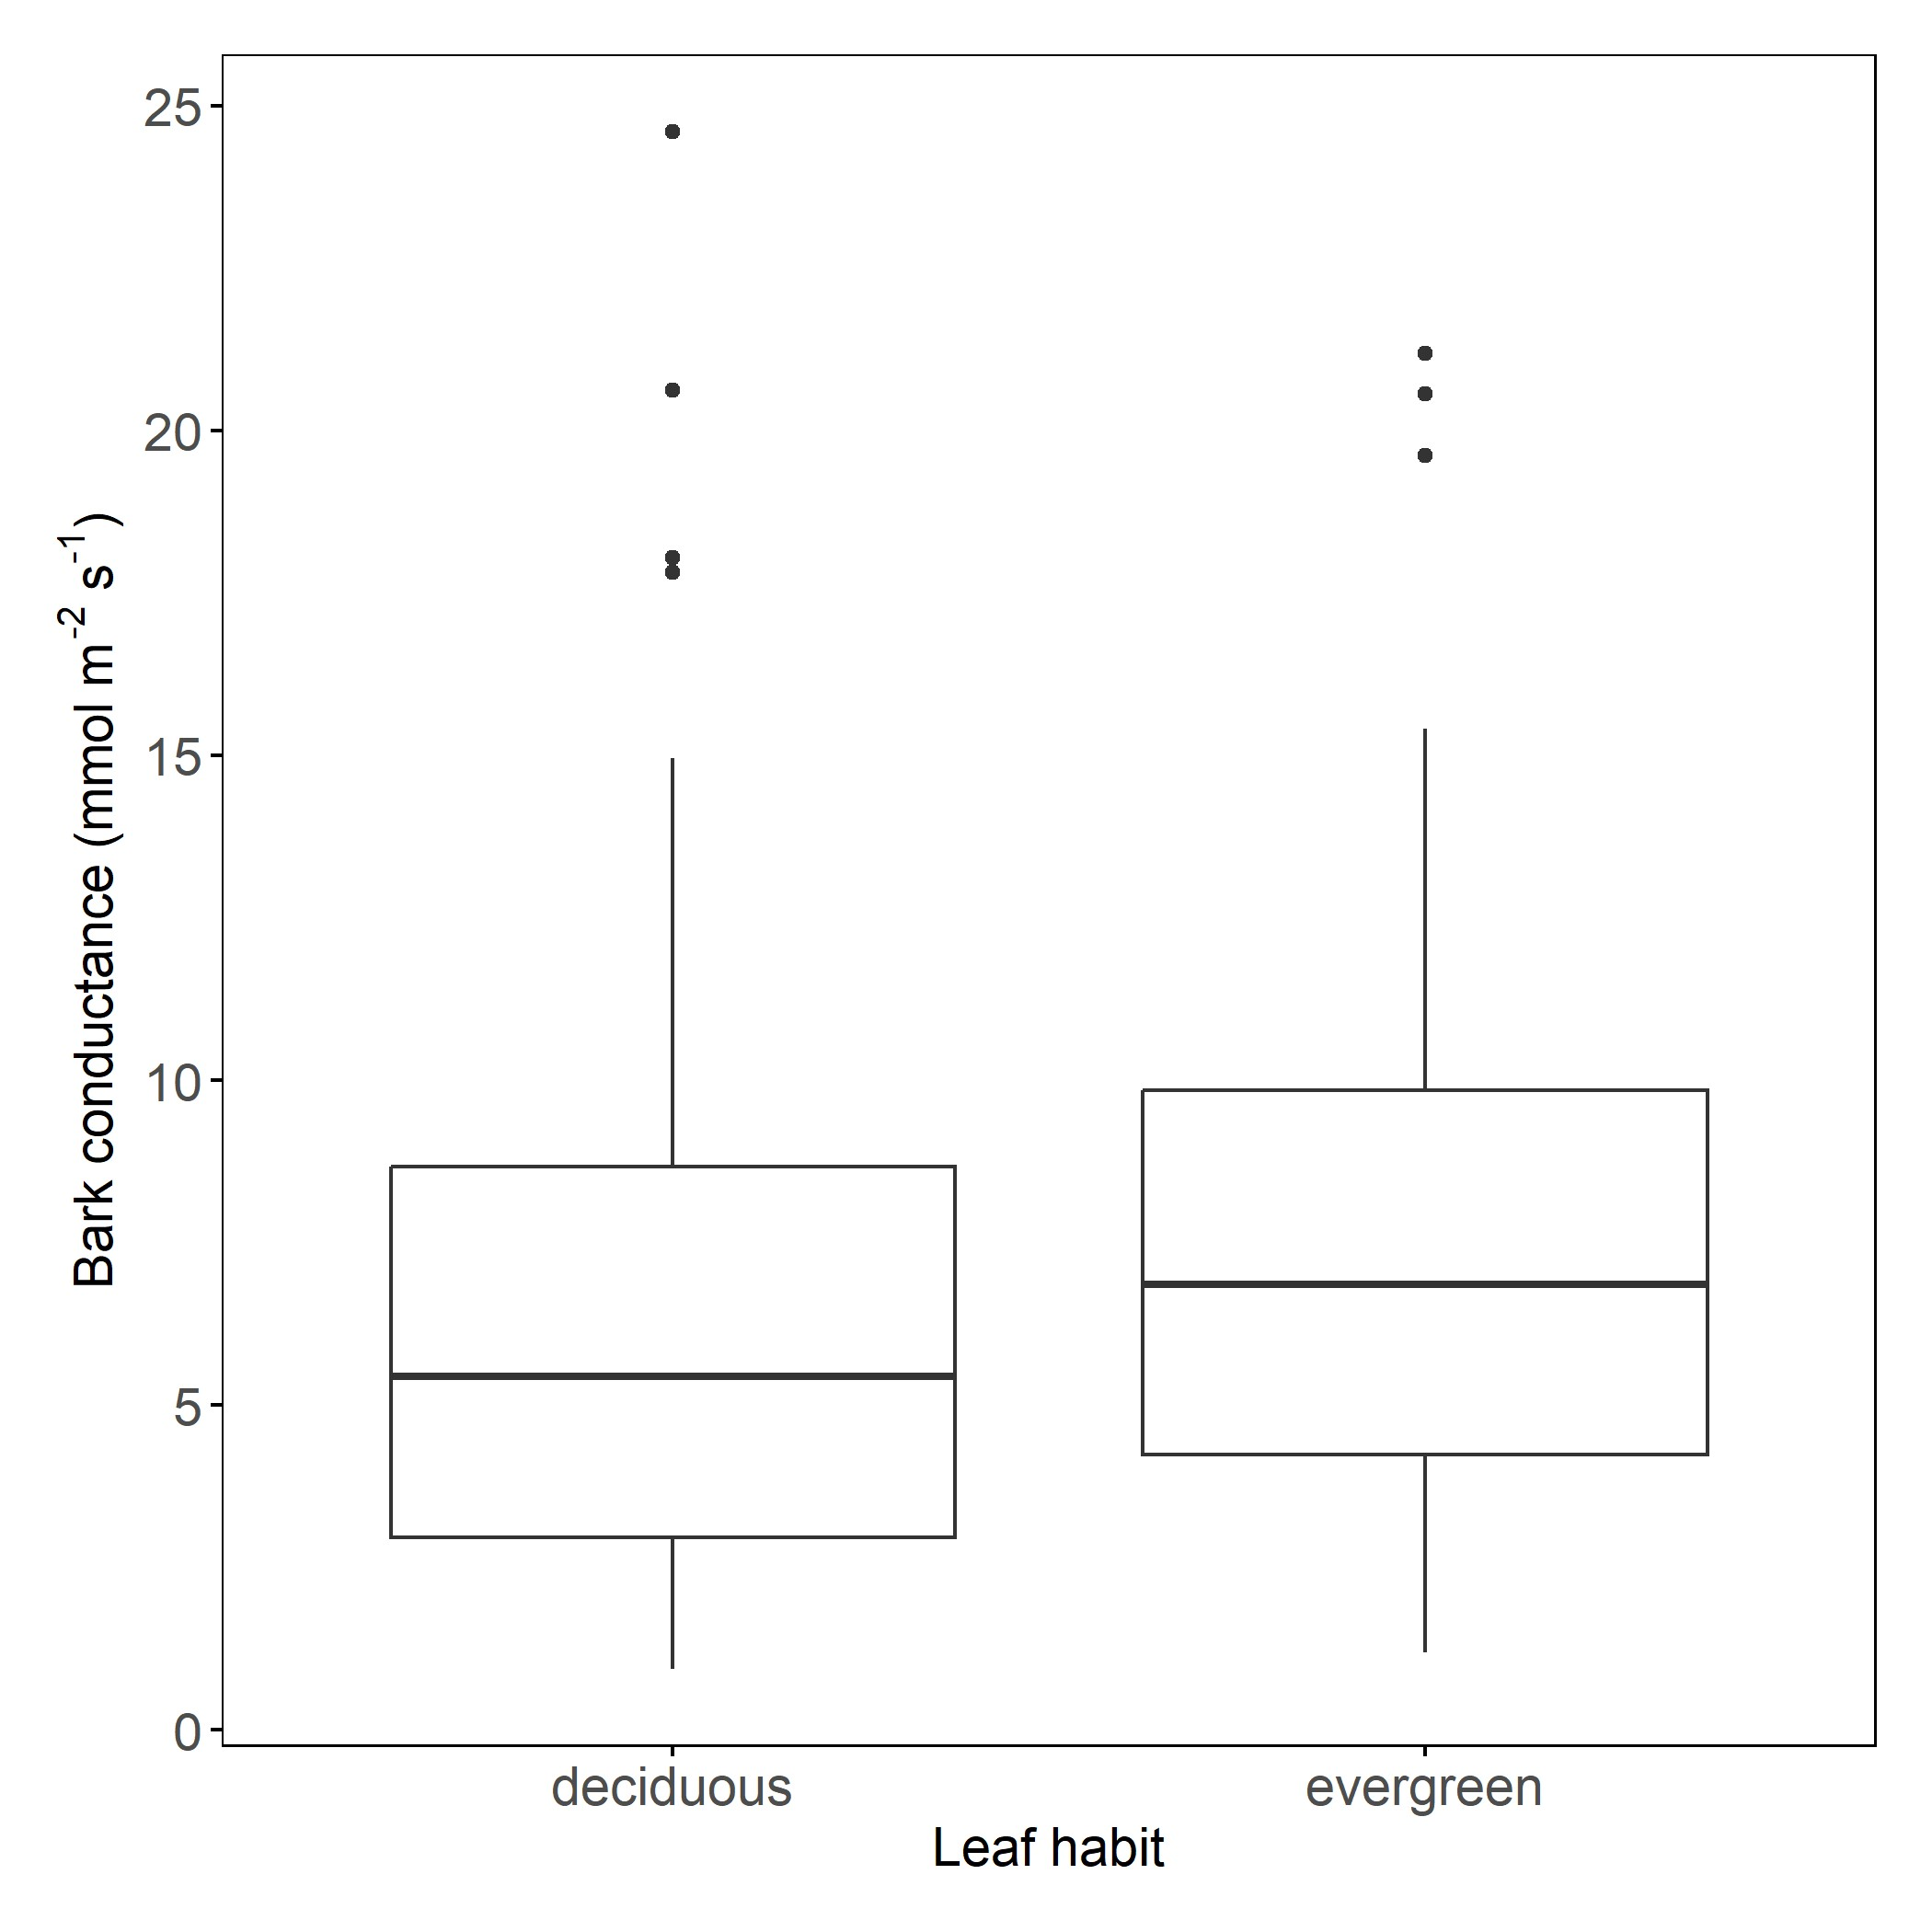


**Figure S4**





**Figure S5**
