# Supplementary material for: Variation in stem bark conductance to water vapor in Neotropical plant species
Source: Frontiers journal article supplement (doi:10.3389/ffgc.2023.1278803), 2024-01-17
Supplement: Table_1.xlsx [file Table_1.xlsx]

## Sheet: Legend
Table S1. List of study species, family, growth form, leaf habit, site and gbark values
Column header	Description
Species	Species name (checked against Tropicos.org)
Family	Family name
Growth.form	Growth form (tree or liana)
Leaf.habit	Leaf habit (deciduous or evergreen)
Site	Site of collection. Abbreviations are as in Table 1
gbark	Bark conductance values (mmol m-2 s-1)

## Sheet: Sheet1
Species	Family	Growth.form	Leaf.habit	Site	gbark
Clusia coclensis	Clusiaceae	tree	evergreen	GCG	NA
Clusia cupulata	Clusiaceae	tree	evergreen	GCG	8.73405
Clusia cylindrica	Clusiaceae	tree	evergreen	GCG	3.02329
Clusia myrsinites	Clusiaceae	tree	evergreen	GCG	6.87718
Clusia fructiangusta	Clusiaceae	tree	evergreen	GCG	4.59338
Clusia guabalensis	Clusiaceae	tree	evergreen	GCG	4.14649
Clusia latipes	Clusiaceae	tree	evergreen	GCG	3.50834
Clusia liesneri	Clusiaceae	tree	evergreen	GCG	2.6212
Clusia lineata	Clusiaceae	tree	evergreen	GCG	4.63583
Clusia longipetiolata	Clusiaceae	tree	evergreen	GCG	6.50261
Clusia minor	Clusiaceae	tree	evergreen	GCG	3.53487
Clusia peninsulae	Clusiaceae	tree	evergreen	GCG	6.9764
Clusia pratensis	Clusiaceae	tree	evergreen	GCG	4.76076
Clusia quadrangula	Clusiaceae	tree	evergreen	GCG	3.43944
Clusia rosea	Clusiaceae	tree	evergreen	GCG	5.18288
Clusia uvitana	Clusiaceae	tree	evergreen	GCG	5.84043
Clusia valerii	Clusiaceae	tree	evergreen	GCG	4.42642
Ficus insipida	Moraceae	tree	evergreen	GCG	7.77262
Garcinia madruno	Clusiaceae	tree	evergreen	GCG	4.47158
Jatropha curcas	Euphorbiaceae	tree	evergreen	GCG	8.11391
Platymiscium pinnatum	Fabaceae	tree	deciduous	GCG	7.46647
Astronium graveolens	Anacardiaceae	tree	deciduous	NAR	2.15555
Cedrela odorata	Meliaceae	tree	deciduous	NAR	1.66054
Ceiba pentandra	Malvaceae	tree	deciduous	NAR	3.2204
Enterolobium cyclocarpum	Fabaceae	tree	deciduous	NAR	2.88752
Erythrina costaricensis	Fabaceae	tree	deciduous	NAR	3.98379
Inga cocleensis	Fabaceae	tree	evergreen	NAR	4.2987
Inga goldmanii	Fabaceae	tree	evergreen	NAR	6.37565
Pachira sessilis	Malvaceae	tree	evergreen	NAR	4.22786
Platypodium elegans	Fabaceae	tree	deciduous	NAR	24.5988
Protium panamense	Burseraceae	tree	evergreen	NAR	5.00824
Vochysia ferruginea	Vochysiaceae	tree	evergreen	NAR	15.2769
Casearia laetioides	Salicaceae	tree	deciduous	NAR	18.0476
Zygia latifolia	Fabaceae	tree	evergreen	NAR	5.56028
Gliricidia sepium	Fabaceae	tree	deciduous	PC	1.67659
Hura crepitans	Euphorbiaceae	tree	deciduous	PC	4.33438
Inga cocleensis	Fabaceae	tree	evergreen	PC	10.1854
Bombax ceiba	Malvaceae	tree	deciduous	PC	0.940004
Schizolobium parahyba	Fabaceae	tree	evergreen	PC	4.00056
Andira inermis	Fabaceae	tree	evergreen	PNAC	6.45116
Ceiba pentandra	Malvaceae	tree	deciduous	PNAC	5.45076
Clusia coclensis	Clusiaceae	tree	evergreen	PNAC	1.19203
Clusia pratensis	Clusiaceae	tree	evergreen	PNAC	3.06597
Clusia rosea	Clusiaceae	tree	evergreen	PNAC	2.58101
Clusia uvitana	Clusiaceae	tree	evergreen	PNAC	1.47564
Garcinia madruno	Clusiaceae	tree	evergreen	PNAC	3.25002
Genipa americana	Rubiaceae	tree	deciduous	PNAC	2.5215
Gliricidia sepium	Fabaceae	tree	deciduous	PNAC	6.16556
Hymenaea courbaril	Fabaceae	tree	deciduous	PNAC	4.06145
Inga spectabilis	Fabaceae	tree	evergreen	PNAC	6.77096
Luehea speciosa	Malvaceae	tree	evergreen	PNAC	5.21769
Bombax ceiba	Malvaceae	tree	deciduous	PNAC	1.85105
Pachira sessilis	Malvaceae	tree	evergreen	PNAC	2.14298
Platypodium elegans	Fabaceae	tree	deciduous	PNAC	20.6236
Posoqueria latifolia	Rubiaceae	tree	evergreen	PNAC	2.54981
Anacardium excelsum	Anacardiaceae	tree	evergreen	PNM	20.568
Annona hayesii	Annonanceae	tree	evergreen	PNM	2.36793
Astronium graveolens	Anacardiaceae	tree	deciduous	PNM	2.98681
Castilla elastica	Moraceae	tree	deciduous	PNM	55.8862
Cavanillesia platanifolia	Malvaceae	tree	deciduous	PNM	7.92138
Cedrela odorata	Meliaceae	tree	deciduous	PNM	3.95958
Genipa americana	Rubiaceae	tree	deciduous	PNM	0.948503
Gliricidia sepium	Fabaceae	tree	deciduous	PNM	6.95425
Hymenaea courbaril	Fabaceae	tree	deciduous	PNM	4.43249
Luehea speciosa	Malvaceae	tree	evergreen	PNM	3.2096
Pachira sessilis	Malvaceae	tree	evergreen	PNM	3.8403
Spondias mombin	Anacardiaceae	tree	deciduous	PNM	6.21452
Acalypha diversifolia	Euphorbiaceae	tree	evergreen	PNS	13.4687
Aiouea montana	Lauraceae	tree	evergreen	PNS	7.70661
Amaioua glomerulata	Rubiaceae	tree	evergreen	PNS	7.40987
Anacardium excelsum	Anacardiaceae	tree	evergreen	PNS	21.1941
Andira inermis	Fabaceae	tree	evergreen	PNS	11.9416
Annona spraguei	Annonaceae	tree	deciduous	PNS	9.66678
Ardisia standleyana	Primulaceae	tree	evergreen	PNS	6.70205
Bignonia corymbosa	Bignoniaceae	liana	evergreen	PNS	6.00162
Brosimum guianense	Moraceae	tree	evergreen	PNS	3.6177
Brownea macrophylla	Fabaceae	tree	evergreen	PNS	6.98942
Bursera simaruba	Burseraceae	tree	deciduous	PNS	6.20938
Piparea dentata	Salicaceae	tree	evergreen	PNS	6.45441
Casearia guianensis	Salicaceae	tree	deciduous	PNS	9.41143
Cassia leiandra	Fabaceae	tree	evergreen	PNS	13.6778
Castilla elastica	Moraceae	tree	deciduous	PNS	3.96868
Ceiba pentandra	Malvaceae	tree	deciduous	PNS	9.37591
Cestrum megalophyllum	Solanaceae	tree	evergreen	PNS	9.71129
Coccoloba acuminata	Polygonaceae	tree	evergreen	PNS	10.5095
Cochlospermum vitifolium	Bixaceae	tree	deciduous	PNS	17.8205
Cojoba rufescens	Fabaceae	tree	evergreen	PNS	7.38448
Croton draco	Euphorbiaceae	tree	evergreen	PNS	7.44836
Cupania latifolia	Sapindaceae	tree	evergreen	PNS	14.0317
Cupania sp	Sapindaceae	tree	evergreen	PNS	8.83783
Enterolobium cyclocarpum	Fabaceae	tree	deciduous	PNS	3.45758
Enterolobium schomburgkii	Fabaceae	tree	deciduous	PNS	8.4394
Erythrina costaricensis	Fabaceae	tree	deciduous	PNS	2.62053
Erythrina fusca	Fabaceae	tree	deciduous	PNS	6.73001
Faramea occidentalis	Rubiaceae	tree	evergreen	PNS	3.41474
Ficus insipida	Moraceae	tree	evergreen	PNS	6.23595
Hirtella racemosa	Chrysobalanaceae	tree	evergreen	PNS	11.1579
Inga cocleensis	Fabaceae	tree	evergreen	PNS	3.63796
Inga goldmanii	Fabaceae	tree	evergreen	PNS	79.7534
Inga spectabilis	Fabaceae	tree	evergreen	PNS	12.8301
Inga vera	Fabaceae	tree	evergreen	PNS	9.86011
Lacistema aggregatum	Lascitemataceae	tree	evergreen	PNS	10.9952
Lindackeria laurina	Achariaceae	tree	evergreen	PNS	9.79312
Mabea occidentalis	Euphorbiaceae	tree	evergreen	PNS	9.65203
Miconia argentea	Melastomataceae	tree	evergreen	PNS	5.29581
Mikania leiostachya	Asteraceae	liana	deciduous	PNS	14.953
Ochroma pyramidale	Malvaceae	tree	evergreen	PNS	9.34738
Ormosia macrocalyx	Fabaceae	tree	evergreen	PNS	6.8473
Piper trinervium	Piperaceae	tree	evergreen	PNS	8.45751
Piper reticulatum	Piperaceae	tree	evergreen	PNS	9.18809
Platymiscium pinnatum	Fabaceae	tree	deciduous	PNS	5.4425
Posoqueria latifolia	Rubiaceae	tree	evergreen	PNS	14.9255
Protium panamense	Burseraceae	tree	evergreen	PNS	7.905
Pseudobombax septenatum	Malvaceae	tree	deciduous	PNS	6.07774
Palicourea brachiata	Rubiaceae	tree	evergreen	PNS	12.1367
Psychotria grandis	Rubiaceae	tree	evergreen	PNS	9.95196
Psychotria limonensis	Rubiaceae	tree	evergreen	PNS	10.0068
Schizolobium parahyba	Fabaceae	tree	evergreen	PNS	3.83297
Serjania mexicana	Fabaceae	liana	evergreen	PNS	7.55691
Serjania mexicana	Sapindaceae	liana	evergreen	PNS	15.4059
Serjania rhombea	Sapindaceae	liana	evergreen	PNS	14.2023
Siparuna pauciflora	Siparunaceae	tree	evergreen	PNS	50.9361
Sorocea affinis	Moraceae	tree	evergreen	PNS	28.161
Spondias mombin	Anacardiaceae	tree	deciduous	PNS	1.14901
Trichilia tuberculata	Meliaceae	tree	evergreen	PNS	14.7348
Triplaris cumingiana	Polygonaceae	tree	deciduous	PNS	9.84981
Virola sebifera	Myristicaceae	tree	evergreen	PNS	7.84447
Vochysia ferruginea	Vochysiaceae	tree	evergreen	PNS	11.5275
Xylopia frutescens	Annonaceae	tree	evergreen	PNS	7.10425
Casearia laetioides	Salicaceae	tree	deciduous	PNS	9.74292
Zygia latifolia	Fabaceae	tree	evergreen	PNS	19.6084
